# Supplementary material for: A 5-Year intervention study on elimination of urogenital schistosomiasis in Zanzibar: Parasitological results of annual cross-sectional surveys
Source: PubMed Central journal article supplement (PMC6502312; doi:10.1371/journal.pntd.0007268), 2019-05-06
Supplement: pntd.0007268.s002.pdf [file pntd.0007268.s002.pdf]

Table S2. Detailed baseline characteristics

| Characteristic                             |                 |          | 9- to 12-year old children | 1st year students | 20- to 55-year old adults |       |           |       |
|--------------------------------------------|-----------------|----------|----------------------------|-------------------|---------------------------|-------|-----------|-------|
| Schools/Shehias -- no.*                    | Pemba           |          | 45                         |                   | 45                        |       | 45        |       |
|                                            | Unguja          |          | 43                         |                   | 43                        |       | 44        |       |
| Total participants -- no.                  | Pemba           |          | 4082                       |                   | 3593                      |       | 1867      |       |
|                                            | Unguja          |          | 4196                       |                   | 3343                      |       | 2148      |       |
| Age -- yr. (SD)                            | Pemba           |          | 10.64                      | 0.97              | 7.67                      | 0.87  | 34.14     | 10.18 |
|                                            | Unguja          |          | 10.42                      | 0.99              | 7.82                      | 0.76  | 34.01     | 10.65 |
| Sex -- no.                                 | Pemba           | Women    | 2236                       |                   | 1899                      |       | 1242      |       |
|                                            |                 | Men      | 1846                       |                   | 1694                      |       | 622       |       |
|                                            | Unguja          | Women    | 2204                       |                   | 1699                      |       | 1630      |       |
|                                            |                 | Men      | 1992                       |                   | 1644                      |       | 518       |       |
| Participants with outcome data -- no.      | Pemba           |          | 4017                       |                   | 3543                      |       | 1865      |       |
|                                            | Unguja          |          | 4137                       |                   | 3270                      |       | 2109      |       |
| <b><i>S. haematobium</i> infection**</b>   |                 |          |                            |                   |                           |       |           |       |
| Individuals infected -- no./No. (%)        | MDA-only        |          | 120/2853                   | 4.21              | 162/2325                  | 6.97  | 38/1337   | 2.84  |
|                                            | Snail control   |          | 209/2688                   | 7.78              | 226/2276                  | 9.93  | 58/1330   | 4.36  |
|                                            | Behavior change |          | 167/2613                   | 6.39              | 213/2212                  | 9.63  | 59/1307   | 4.51  |
|                                            | Pemba           |          | 328/4017                   | 8.17              | 432/3543                  | 12.19 | 102/1865  | 5.47  |
|                                            | Unguja          |          | 168/4137                   | 4.06              | 169/3270                  | 5.17  | 53/2109   | 2.51  |
| Arithmetic mean no. of eggs/10 ml of urine | Pemba           |          | 8.16                       |                   | 13.2                      |       | 1.02      |       |
|                                            | Unguja          |          | 1.07                       |                   | 2.96                      |       | 0.37      |       |
| Infection intensity — no./No (%)***        | Pemba           | Negative | 3678/4004                  | 91.86             | 3101/3533                 | 87.77 | 1759/1861 | 94.52 |
|                                            |                 | Light    | 219/4004                   | 5.47              | 263/3533                  | 7.44  | 95/1861   | 5.1   |
|                                            |                 | Heavy    | 107/4004                   | 2.67              | 169/3533                  | 4.78  | 7/1861    | 0.38  |
|                                            | Unguja          | Negative | 3907/4069                  | 96.02             | 3024/3190                 | 94.8  | 2035/2088 | 97.46 |
|                                            |                 | Light    | 143/4069                   | 3.51              | 134/3190                  | 4.2   | 49/2088   | 2.35  |
|                                            |                 | Heavy    | 19/4069                    | 0.47              | 32/3190                   | 1     | 4/2088    | 0.19  |
| Microhaematuria intensity — no./No (%)     | Pemba           | Negative | 3572/4017                  | 88.92             | 3014/3543                 | 85.07 | 1598/1864 | 85.73 |
|                                            |                 | Trace    | 134/4017                   | 3.34              | 157/3543                  | 4.43  | 84/1864   | 4.51  |
|                                            |                 | (+)      | 105/4017                   | 2.61              | 78/3543                   | 2.2   | 86/1864   | 4.61  |
|                                            |                 | (++)     | 110/4017                   | 2.74              | 167/3543                  | 4.71  | 67/1864   | 3.59  |
|                                            |                 | (+++)    | 96/4017                    | 2.39              | 127/3543                  | 3.58  | 29/1864   | 1.56  |
|                                            | Unguja          | Negative | 3828/4129                  | 92.71             | 3140/3256                 | 96.44 | 1888/2108 | 89.56 |
|                                            |                 | Trace    | Nov 29                     | 0.27              | Mrz 56                    | 0.09  | 49/2108   | 2.32  |
|                                            |                 | (+)      | 93/4129                    | 2.25              | 23/3256                   | 0.71  | 52/2108   | 2.47  |
|                                            |                 | (++)     | 92/4129                    | 2.23              | 38/3256                   | 1.17  | 52/2108   | 2.47  |
|                                            |                 | (+++)    | 105/4129                   | 2.54              | 52/3256                   | 1.6   | 67/2108   | 3.18  |

\* 2 schools and one shehia were not surveyed in Unguja at baseline

\*\* *S. haematobium*-positive is defined as urine filtration egg-positive or, in the absence of a urine filtration result, as haematuria-positive (trace, +, ++, +++).

\*\*\* The intensity of *S. haematobium* infection was categorized as negative (0 eggs per 10 ml of urine), light (1 to 49 eggs per 10 ml of urine), or heavy (≥50 eggs per 10 ml of urine)
